1  
2  
3  
4  
5  
6  
7  
8  
9  
10  
11  
12  
13  
14  
15  
16  
17  
18

**Multimorbidity and healthcare utilization: A register-based study in Denmark**

Anne Frølich<sup>1&2\*</sup>, Nermin Ghith<sup>1</sup>, Michaela Schiøtz<sup>1</sup>, Ramune Jacobsen<sup>1</sup>, Anders Stockmarr<sup>3</sup>

<sup>1</sup> The Research Unit for Chronic Conditions, Center for Clinical Research and Prevention,  
Bispebjerg Frederiksberg Hospital, The Capital Region, Copenhagen, Denmark

<sup>2</sup> Institute for Public Health, University of Copenhagen

<sup>3</sup> Department of Applied Mathematics and Computer Science, The Technical University of  
Denmark, Copenhagen, Denmark

\* Corresponding author

Email: [Anne.Froelich@regionh.dk](mailto:Anne.Froelich@regionh.dk)

## 19 **Abstract**

### 20 **Background**

21 People with multimorbidity have reduced functional capacity, lower quality of life, and higher  
22 mortality rates and use healthcare resources more intensively than healthy people or those with a  
23 single chronic condition. The aim of this study was to explore associations between multimorbidity  
24 and use of healthcare services and the impact of socioeconomic status on utilization of  
25 hospitalizations and bed days.

### 26 **Methods**

27 The study population included all individuals aged 16 years and older who lived in the Capital  
28 Region of Denmark on January 1st, 2012. Data on chronic conditions, use of healthcare services  
29 and demographics were obtained from Danish national administrative and health registries. Zero-  
30 inflated models were used to calculate anticipated annual use of hospitalizations and bed days.

### 31 **Findings**

32 The study population comprised 1,397,173 individuals; the prevalence of multimorbidity was 22%.  
33 Prevalence was inversely related to educational attainment. For people with multimorbidity,  
34 utilization of hospitalizations and bed days increased approximately linearly with the number of  
35 chronic conditions. However, a steep increase in utilization of bed days was observed between five  
36 and six or more chronic conditions. An educational gradient in hospitalization rates and use of bed  
37 days was observed regardless of the number of chronic conditions. Educational attainment was  
38 strongly associated with healthcare utilization.

### 39 **Conclusion**

40 Multimorbidity was associated with a significant increase in utilization of all healthcare services in  
41 Denmark. In addition, a socioeconomic gradient was observed in utilization of hospitalizations and  
42 bed days.

43

## 45 **Introduction**

46           Multimorbidity is often defined as the coexistence of two or more chronic conditions in the  
47 same person [1, 2]. People with multimorbidity have decreased functional competence [3],  
48 lower quality of life [4], higher mortality rates [5] and use healthcare resources more  
49 intensively than healthy people or those with just one chronic condition [6]. Most diseases  
50 and consequences of poor health are unequally distributed among socioeconomic population  
51 groups, and socioeconomic differences are obvious in the prevalence and consequences of  
52 multimorbidity [7, 8]. The prevalence of multimorbidity is increasing internationally. The  
53 overall prevalence of multimorbidity in Ontario, Canada increased in nearly all age groups,  
54 reflecting a 40% total increase between 2003 and 2009 from 17.4% to 24.3% [9]. A study  
55 from the Netherlands reported an increase in multimorbidity prevalence from 12.7% to  
56 16.2% between 2004 and 2011 [10]. An American study showed that the prevalence of  
57 multimorbidity rose between 2000 and 2010 from 22% to 30%, a trend that was most  
58 pronounced among people younger than age 65 [11]. Expected continuing increases in the  
59 prevalence of multimorbidity are recognized as a major public health and healthcare  
60 challenge for modern societies [9].

61           To understand the healthcare challenges associated with multimorbidity, the impact of  
62 multimorbidity on healthcare utilization must be carefully assessed [12, 13]. However,  
63 detailed knowledge about how multimorbidity affects healthcare utilization is incomplete. A  
64 systematic review identified 35 studies investigating relationships between multimorbidity  
65 and healthcare utilization, healthcare costs, or both. All included studies showed a positive  
66 correlation between multimorbidity and at least one aspect of utilization (physician visits and  
67 hospital care) and costs (medications, out-of-pocket spending, and total healthcare costs) for

68 elderly populations [14]. The included studies were from the United States (23), Europe (5),  
69 Canada (4), Asia (2), and Australia (1). Many of these study populations were large enough to  
70 enable sophisticated statistical analyses, and four were large cross-sectional studies that  
71 included 1.13 million to 1.65 million people [15-17]. Regrettably, these large studies had  
72 varying inclusion criteria, and none reported sociodemographic data that are necessary for  
73 exploring possible associations between multimorbidity, healthcare utilization, and  
74 sociodemographic status. Synthesis of the studies was not possible due to ambiguous  
75 definitions and measurements of multimorbidity, as well as a multitude of healthcare  
76 utilization outcomes.

77         After publication of this systematic review, several large-scale studies [18-22]  
78 exploring the relationship between healthcare utilization and the number of chronic  
79 conditions demonstrated that additional factors affecting utilization include age [18, 19],  
80 gender [18, 19], impaired activities of daily life [20], and socioeconomic status [19].  
81 Furthermore, the impact of multimorbidity on healthcare utilization has been shown to differ  
82 across individual factors, disease combinations, healthcare systems, and regions [22, 23].

83         The Danish healthcare system is based on universal coverage and principles of free and  
84 equal access to healthcare for all citizens. Information on the impact of multimorbidity on  
85 healthcare utilization in the Danish healthcare system is sparse. To the best of our knowledge,  
86 only a single study to date has demonstrated that hospitalizations, use of bed days and  
87 general practitioner (GP) visits, were significantly higher for patients with multimorbidity,  
88 compared with those who had no chronic conditions [24].

89         The aim of this study was to explore associations between multimorbidity and  
90 healthcare utilization and the impact of socioeconomic status on utilization of hospitalizations and  
91 bed days. The structure and content of Danish healthcare registers provide a unique

92 opportunity to quantify how these variables interact [25, 26], which we explored in a large-  
93 scale, cross-sectional, regional, register-based population study.

94

## 95 **Methods**

### 96 **Study population and data sources**

97         The study population included all individuals aged 16 years and older who lived in the  
98 Capital Region of Denmark on January 1st, 2012. The included 1,397,173 individuals  
99 represented approximately one-third of the entire Danish adult population. Data on chronic  
100 conditions, use of healthcare services, and demographics, including gender, age, and  
101 educational attainment, were obtained from Danish national administrative and health  
102 registries: the Danish National Patient Registry [27], the Danish National Prescription  
103 Registry [28], the Danish National Health Service Registry [29], and The National Diabetes  
104 Registry [30]. All data obtained from registries were merged at the level of individuals using  
105 their unique social security numbers. However, national registries do not provide data on  
106 conditions diagnosed in the primary care sector. In addition to data on diagnoses of chronic  
107 conditions available from the secondary healthcare sector, diagnostic algorithms developed  
108 by the Research Center for Prevention and Health at Glostrup University Hospital were used  
109 to identify primary sector diagnoses of 16 chronic conditions of interest for the entire  
110 population (Table 1) [6]. Details about the diagnostic algorithms are provided elsewhere [7].  
111 Multimorbidity was defined as two or more chronic conditions occurring simultaneously in  
112 the same person.

113

114 **Table 1.** Chronic conditions included in definition of multimorbidity (N = 16)

|     |                                       |
|-----|---------------------------------------|
| 115 | Allergies                             |
| 116 | Hypertension                          |
| 117 | High cholesterol                      |
| 118 | Diabetes (type 1 and type 2)          |
| 119 | Heart disease                         |
| 120 | Stroke                                |
| 121 | Back pain                             |
| 122 | Joint disease                         |
| 123 | Osteoarthritis                        |
| 124 | Osteoporosis                          |
| 125 | Chronic obstructive pulmonary disease |
| 126 | Cancer                                |
| 127 | Dementia                              |
| 128 | Anxiety                               |
| 129 | Long-term use of antidepressants      |
| 130 | Schizophrenia                         |

131

132           Because data on direct costs could not be linked to the study data, we identified  
133 utilization of hospitalizations and bed days, which are among the most expensive services in  
134 healthcare, as proxies for direct costs. Socioeconomic status was defined as highest  
135 educational achievement and grouped into four categories according to the length of  
136 education: none (primary school) ( $\leq 10$  years), short (11-14 years), medium (14-17 years),  
137 and long ( $\geq 17$  years) [31]. Finally, we also recorded healthcare utilization for emergency

138 department visits, outpatient visits, GP visits, out-of-hour GP visits, yearly control visits in  
139 general practice, and specialist visits during 2012.

## 140 **Statistical analysis**

141 Descriptive statistics were calculated for gender, age, and educational attainment by  
142 the number of chronic conditions. Means for each type of healthcare utilization were  
143 calculated. Logistic regression was used to calculate odds ratios (ORs) for healthcare  
144 utilization for individuals with multimorbidity versus individuals with none and with one  
145 chronic condition. ORs were calculated in both a raw form and adjusted for gender, age, and  
146 educational attainment.

147 As cost data was not linked to the present dataset we chose to investigate the effect of  
148 socioeconomic status based on the proxies for general healthcare utilization: hospitalizations  
149 and bed days. Hospitalizations and bed days were adjusted for emergency visits, out-patient  
150 visits GP visits, out-of-hours GP visits, yearly controls in general practice, private specialist  
151 visits, number of conditions, age, gender, cohabitation status, education attainment, and  
152 employment status.

153 This was accomplished by applying zero-inflated models to both proxies. The models were used to  
154 calculate anticipated annual use of hospitalizations and bed days within educational attainment  
155 groups, separately for each number of chronic conditions.

156 The decision to use zero-inflated models was prompted by the fact that many individuals do  
157 not use bed days or hospitalization [32]. To counter extreme values for some covariates, squared  
158 effects of all numerical covariates were included as explanatory variables. For the partial model (1)  
159 below, a squared effect of GP visits was not included due to convergence problems. For the partial  
160 models of the form (2) below, quadrupled effects of ambulatory visits and out-of-hours GP visits  
161 were included. The zero-inflated model was applied as follows.



162 First, the probability  $p$  of having at least one bed day/one hospitalization was modeled with  
163 a logistic regression model

$$164 \quad \text{logit}(p_i) = \sum_{j=1}^{26} \alpha_j x_{ji}, i = 1, \dots, n, \quad (1)$$

165 where  $p_i$  is the probability of one or more hospitalizations or bed days for an individual  $i$  and  $x_j$  is  
166 the  $j$ th covariate derived from the specified explanatory variables. Subsequently, numbers of bed  
167 days and hospitalizations  $y$  were similarly modeled with a log-linear model,

$$168 \quad \log(y_i) = \sum_{j=1}^{29} \beta_j x_{ji} + \varepsilon_i, i = 1, \dots, n_1, \quad (2)$$

169 where  $n_1 \leq n$  is the number of individuals with at least one bed day or hospitalization. In the  
170 models (2), two observations of bed days and three observations of hospitalizations were omitted as  
171 outliers for the analysis of bed days and hospitalizations, respectively.

172 For scenarios in which a specific number of conditions and a specific level of education  
173 were assumed, the linear predictors  $\hat{\eta} = \sum \hat{\alpha}_j x_j$  and  $\hat{\lambda} = \sum \hat{\beta}_j x_j$  were calculated, with all other  
174 covariates kept at the empirical mean for the group with the specified number of conditions and  
175 level of education. Estimated responses were found as  $\hat{y} = \text{logit}^{-1}(\hat{\eta}) \exp(\hat{\lambda} + \hat{\sigma}^2/2)$ , where  $\sigma^2$  is  
176 the variance of  $\hat{\lambda}$ , thus combining models (1) and (2). All analyses were carried out using R  
177 software version 3.5.0 (34).

178

## 179 **Ethics approval:**

180 Approval to conduct the study was obtained from the Danish Data Protection Agency. No informed  
181 consent was required.

182

## 183 **Results**

184            Among 1,397,173 individuals included in the study population, approximately half  
185 (720,885; 52%) were women, the majority (927,568; 66%) had none or short education, and  
186 the prevalence of multimorbidity was 22% (301,757). Table 2 shows the distribution of  
187 gender, age, and educational attainment by the number of chronic conditions. The prevalence  
188 of both one and two or more chronic conditions was significantly higher for women than for  
189 men. Overall, multimorbidity was highest among individuals 65-84 years old, followed by  
190 those who were 45-64 years old. Educational attainment was inversely related to  
191 multimorbidity.

192

193

194 **Table 2.** Distributions of the study population (N = 1,397,173) by gender, age, and educational  
 195 attainment and number of chronic conditions, N (%)

196

197

|     |                      | Number of chronic conditions |              |              |
|-----|----------------------|------------------------------|--------------|--------------|
|     |                      | 0                            | 1            | ≥ 2          |
|     |                      | N = 809,920                  | N = 285,496  | N = 301,757  |
| 200 | Gender               |                              |              |              |
| 201 | Male                 | 418,105 (62)                 | 127,591 (19) | 130,592 (19) |
| 202 | Female               | 391,815 (54)                 | 157,905 (22) | 171,165 (24) |
| 203 | Age in years         |                              |              |              |
| 204 | 16-24                | 170,486 (86)                 | 25,768 (13)  | 1,770 (1)    |
| 205 | 25-44                | 385,540 (77)                 | 89,216 (18)  | 23,557 (5)   |
| 206 | 45-64                | 205,947 (48)                 | 111,147 (26) | 110,949 (26) |
| 207 | 65-84                | 45,529 (19)                  | 53,334 (22)  | 140,001 (59) |
| 208 | >84                  | 2,418 (7)                    | 6,031 (18)   | 25,480 (75)  |
| 209 | Education            |                              |              |              |
| 210 | None (≤ 10 years)    | 185,347 (53)                 | 69,779 (20)  | 93,702 (27)  |
| 211 | Short (11-14 years)  | 325,241 (56)                 | 123,439 (22) | 130,420 (23) |
| 212 | Medium (15-16 years) | 132,531 (59)                 | 49,576 (22)  | 41,536 (19)  |
| 213 | Long (≥ 17 years)    | 107,578 (65)                 | 34,035 (21)  | 22,174 (14)  |
| 213 | Missing              | 59,233 (72)                  | 8,667 (11)   | 13,925 (17)  |

214 Mean rates of healthcare utilization among people with multimorbidity were much  
 215 higher than among people with no chronic conditions, by a factor of 1.73 to 9.67, depending  
 216 on the type of utilization (Table 3). When comparing people with multimorbidity and those  
 217 with one chronic condition, rates of healthcare utilization were 1.44 to 4.00 times higher for

218 those with multimorbidity. In both comparisons, the largest between-group difference was for  
 219 yearly control visits in general practice. Unadjusted and adjusted ORs for all types of  
 220 healthcare utilization were significantly higher ( $p < 0.001$ ) among people with multimorbidity,  
 221 compared with people with zero or one chronic condition. Unadjusted ORs for healthcare  
 222 utilization for people with multimorbidity were 1.65 to 11.76 times higher than for people  
 223 with no chronic conditions and 1.31 to 3.15 times higher than for people with one chronic  
 224 condition (Table 3). Adjusted ORs for healthcare utilization for people with multimorbidity  
 225 were 1.86 to 6.70 times higher than for people with no chronic conditions and 1.44 to 2.94  
 226 times higher than for people with one chronic condition (Table 3).

227

228 **Table 3.** Mean and odds ratios (ORs) for healthcare utilization among individuals with 0, 1, and  $\geq 2$   
 229 chronic conditions

230

|                                              | Number of chronic conditions |      |          |                     |                  |                  |                  |
|----------------------------------------------|------------------------------|------|----------|---------------------|------------------|------------------|------------------|
|                                              | 0                            | 1    | $\geq 2$ | $\geq 2$ vs. 0      |                  | $\geq 2$ vs. 1   |                  |
|                                              | Mean                         |      |          | Unadjusted OR       | Adjusted OR*     | Unadjusted OR    | Adjusted OR*     |
| Hospitalizations                             | 0.12                         | 0.22 | 0.51     | 3.84 (3.80-3.88)    | 2.78 (2.74-2.83) | 2.26 (2.23-2.29) | 1.77 (1.75-1.80) |
| Bed days                                     | 0.31                         | 0.82 | 2.65     | 3.84 (3.80-3.88)    | 2.78 (2.74-2.85) | 2.26 (2.23-2.29) | 1.77 (1.75-1.80) |
| Emergency visits                             | 0.15                         | 0.18 | 0.26     | 1.65 (1.63-1.66)    | 1.86 (1.83-1.88) | 1.39 (1.37-1.41) | 1.49 (1.47-1.52) |
| Outpatient visits                            | 0.91                         | 1.88 | 3.86     | 4.83 (4.79-4.87)    | 3.79 (3.76-3.84) | 2.25 (2.23-2.29) | 2.03 (2.01-2.05) |
| General practice visits                      | 4.34                         | 7.39 | 12.94    | 8.37 (8.31-8.44)    | 6.70 (6.64-6.76) | 3.15 (3.13-3.18) | 2.94 (2.91-2.27) |
| Out-of-hours general<br>practice visits      | 0.28                         | 0.38 | 0.56     | 1.66 (1.64-1.67)    | 2.23 (2.19-2.26) | 1.31 (1.29-1.32) | 1.59 (1.57-1.61) |
| Yearly control visits in<br>general practice | 0.03                         | 0.12 | 0.29     | 11.76 (11.58-11.96) | 5.66 (5.56-5.77) | 2.86 (2.81-2.89) | 1.96 (1.93-1.98) |
| Specialist visits                            | 0.69                         | 1.39 | 2.09     | 3.66 (3.63-3.69)    | 2.36 (2.34-2.39) | 1.77 (1.75-1.79) | 1.44 (1.43-1.45) |

231 \*Adjusted for gender, age, and educational attainment

232           Among people with multimorbidity, utilization of hospitalizations increased  
233 approximately linearly with the number of chronic conditions. In Fig. 1A, hospitalization rates  
234 are indicated with a black line; the reference regression line in red has a slope equal to the  
235 mean number of hospitalizations across the number of chronic conditions. The similarity  
236 between observed rates and the regression line indicates that each chronic condition  
237 corresponded to an average of approximately 0.24 hospitalizations per year. A similar pattern  
238 was observed for bed days (Fig. 1B). For people with five or fewer chronic conditions, the  
239 utilization of bed days was approximately proportional to the number of conditions. However,  
240 between five and six or more chronic conditions, a steep increase in utilization of bed days  
241 was observed. Among individuals with six or more chronic conditions, utilization was higher  
242 than the mean number of bed days per condition multiplied by the number of conditions.

243

244 **Fig 1.**

245 **1A. Relationship between numbers of chronic conditions and hospitalizations.**

246 The black line indicates the number of hospitalizations by the number of chronic conditions. The  
247 red line indicates the mean number of hospitalizations multiplied by the number of chronic  
248 conditions.

249 **1B. Relationship between numbers of chronic conditions and bed days.**

250 The black line indicates the number of bed days by number of chronic conditions. The red line  
251 represents the mean number of bed days multiplied by the numbers of chronic conditions.

252

253

254           Fig 2 and Fig 3 depict utilization of hospitalization and bed days stratified by  
255 educational attainment. An educational gradient in hospitalization rates was observed across

256 one to six or more chronic conditions (Fig 2). Hospitalizations were more frequent in  
257 individuals with shorter education, compared with those with longer education. For bed day  
258 utilization (Fig 3), individuals with no education exhibited the highest estimated utilization  
259 rates, regardless of the number of chronic conditions.

260

261 **Fig 2. Number of chronic conditions associated with the modeled rate of hospitalizations by**  
262 **educational attainment levels**

263 Black line, no education; red line, short education; green line, medium education; blue line, long  
264 education.

265

266 **Fig 3. Number of chronic conditions associated with the modeled rate of bed days by**  
267 **educational attainment**

268 Black line, no education; red line, short education; green line, medium education; blue line, long  
269 education.

270

## 271 **DISCUSSION**

272 This study is the first large-scale, register-based study investigating associations between  
273 multimorbidity and utilization of healthcare services in the secondary and primary sectors in  
274 Denmark. In this study we were able to obtain a medical diagnosis for all diseased adults in the  
275 Capital Region aged 16 and above using algorithmic diagnoses for 16 conditions. This contrasts  
276 with studies using register-based diagnoses that only included patients who had had a hospital  
277 admission or were affiliated with an outpatient clinic. Although the 16 selected conditions do not  
278 represent the full spectrum of chronic disease, they include highly prevalent chronic conditions. A

279 similar study from Scotland [33] included 40 conditions and revealed an age-stratified pattern of  
280 prevalence of chronic conditions nearly identical to that of the data reported here [7, 33]. This  
281 suggests that the 16 included diagnoses in this study encompass all conditions and combinations of  
282 conditions that are predominant at the population level.

283 The prevalence of multimorbidity in our study was 22% [7]. Females had a 10%  
284 overrepresentation among individuals with multimorbidity (Table 2). However, in this study the  
285 overrepresentation of women among multimorbid individuals cannot be explained by the longevity  
286 of women alone: The frequency of multimorbidity within each one-year age group was consistently  
287 higher for women than men from 68 years to 100 years of age, the difference increasing with age.  
288 This finding is consistent with previous results across healthcare systems and geography [34-36].  
289 Eighty percent of the study population and 45% of individuals with multimorbidity were younger  
290 than age 65 (Table 2). The study of multimorbidity is often confined to adults aged 65 and up [19,  
291 37-39]. However, younger individuals with multimorbidity who survive will age into this group and  
292 can be expected to have higher lifelong healthcare utilization. In fact, we observed that, compared  
293 to age-similar individuals without chronic conditions, younger multimorbid individuals had a  
294 relatively higher rate of bed day utilization than did older individuals with multimorbidity This  
295 finding highlights the importance of understanding chronic illness and healthcare utilization of  
296 younger multimorbid persons.

## 297 **Utilization vs. number of conditions**

298 The consistency of increases in healthcare utilization for individuals with multimorbidity,  
299 compared to those without chronic conditions, is remarkable (Table 3). The use of all services was  
300 higher to a statistically significant degree. Excluding hospitalizations and bed days, the increase in  
301 utilization rates for individuals with multimorbidity ranged from 73% (emergency department  
302 visits) to 324% (outpatient visits), except for yearly control visits in general practice, which were

303 867% higher. Disregarding the latter due to very low utilization rates, the average increase in  
304 healthcare utilization was 180% for individuals with multimorbidity, compared to those with no  
305 chronic conditions. The corresponding average increase in utilization rates for multimorbid  
306 individuals, compared with those with one chronic disease, was 65%. Unadjusted ORs for  
307 healthcare utilization for individuals with multimorbidity, compared with those with no chronic  
308 conditions, were all statistically significant and ranged from 1.65 (95% confidence interval [CI],  
309 1.63 – 1.66) for emergency department visits and 11.76 (95% CI, 11.58 – 11.96) for yearly control  
310 visits. When adjusted for gender, age, and educational attainment, utilization differences were less  
311 pronounced, ranging from 1.86 (95% CI, 1.83 – 1.88) for emergency department visits to 6.70 (95%  
312 CI, 6.64 – 6.76) for GP visits. A similar but less pronounced pattern was seen when comparing  
313 multimorbid individuals to those with one chronic disease (Table 3). These results demonstrate that  
314 the impact of multimorbidity on healthcare utilization applies to a range of services and varies  
315 relatively little. Healthcare utilization rates were 2-4 times higher than those for people without  
316 chronic conditions. The direct relationship between the number of chronic conditions and healthcare  
317 utilization is well-documented in the literature [14, 23, 24, 40, 41], but, to the best of our  
318 knowledge, the impact of multimorbidity on a broad spectrum of healthcare utilization has not been  
319 documented previously.

320 The approximately linear relationship between frequency of hospitalizations and the number  
321 of chronic conditions depicted in Fig. 1A also applies to the relationship between bed days and the  
322 number of chronic conditions in Fig. 1B for five or fewer conditions. When the number of  
323 conditions increases to six or more, the utilization of bed days increases by a factor greater than the  
324 impact of a single additional condition. The overall utilization pattern is that each condition  
325 corresponds to 0.24 hospitalizations and 0.92 bed days, while the length of each hospitalization is  
326 longer for individuals with six or more conditions. The slope of the curve for six or more conditions



327 increases twofold to 1.84 (Fig 1B). The fact that the regression coefficient no longer explains the  
328 frequency of bed days per chronic condition leads us to define individuals with six or more  
329 conditions as high utilizers; they make up 0.87% of the population but account for 7.29% of bed  
330 days. An earlier Danish study found that 5% of the population with chronic conditions accounted  
331 for 45% of healthcare expenses [42]. This finding is in line with a large US study that showed that  
332 5% of high utilizers accounted for up to 47% of healthcare costs [43]. A recent German study  
333 reported two subgroups of high utilizers: the oldest patients who suffered from severe  
334 multimorbidity and younger elderly patients with psychiatric or psychosomatic conditions [40].  
335 Future research is required to examine characteristics and utilization of the high utilizers identified  
336 in this study.

337 Fig 1A shows a decline in utilization between nine and ten or more conditions. A possible  
338 explanation is that individuals with a very high disease burden have higher mortality, while those  
339 who survive have lower healthcare utilization than expected. Only 43 individuals had ten or more  
340 diagnosed conditions, and small sample size effects may also contribute to this finding.

## 341 **Socioeconomic status**

342 We found that the prevalence of multimorbidity decreased with increasing educational  
343 attainment, revealing a pronounced and statistically significant inverse socioeconomic gradient.  
344 This is consistent with previous findings [7].

345 To study the impact of multimorbidity on healthcare costs, we adjusted data for proxy costs  
346 for different educational attainment groups with varying profiles in terms of age, gender, other  
347 healthcare utilization and level of multimorbidity. When adjusted for these effects, as described in  
348 the methods statistical section, a clear inverse social gradient in hospitalization utilization appeared  
349 (Fig. 2). Adjusted hospitalization utilization decreased as the level of educational attainment  
350 increased, generally irrespective of the number of chronic conditions. However, adjusted bed-day

351 utilization revealed a slightly different pattern. An educational gradient no longer appeared; curves  
352 for short, medium, and high educational attainment tended to overlap. However, the group with no  
353 educational attainment stood out by virtue of higher healthcare utilization than the other. One  
354 important feature is that the relative difference between utilization rates for individuals with no  
355 education and those in other educational groups appeared close to constant across the number of  
356 chronic conditions.

357 In general, the number of hospitalizations decreased with increasing level of educational  
358 attainment. For multimorbid individuals, the length of each hospitalization was longer for  
359 individuals without any education than for those with at least some education. The reason for this  
360 finding is unknown. It may be the case that chronic disease tends to be more severe among  
361 individuals without education and that longer hospitalizations are caused by non-chronic conditions  
362 not included in our study. In addition, one could posit that different spectra of chronic conditions  
363 occur for persons with and without education, but investigation of this supposition will require  
364 further research. Other factors affecting the higher healthcare utilization rate observed in people  
365 with lower education attainment include lower health literacy levels linked to lower education  
366 attainment [44]. Disease burden has been shown to be associated with lower education levels in  
367 type 2 diabetes, and this may apply to other chronic conditions [45]. Furthermore, people with none  
368 or low educational attainment often has weak social networks and proper discharge to home might  
369 demand coordinated preparation that rely, in part, on support from individual's own social support  
370 structure [46]. However, we currently lack a well-founded explanation for differences in the two  
371 adjusted proxies for general utilization of healthcare services.

## 372 **Strengths and limitations**

373 The major strength of our study is that it is a large-scale register-based study, including  
374 comprehensive information about chronic conditions, healthcare utilization, and educational

375 attainment of the complete population of the Capital Region of Denmark aged 16 years and above.  
376 Generally, data from the Danish national registers provide complete information about healthcare  
377 system contacts, are of high quality and reliability, and are used extensively in research [25, 47]. As  
378 a general population-based study, our findings reflect the actual situation in a real-world setting.  
379 Based on register data, our study was free of recall bias and there was no loss of follow up.

380         Several limitations of our study deserve consideration. The necessary use of diagnostic  
381 algorithms to identify patients with chronic conditions in the primary healthcare sector is an  
382 approximation of actual diagnoses. Although the diagnostic algorithms have been shown to be  
383 highly accurate [6], they are not clinically determined by physicians. The study was based on cross-  
384 sectional data collected during a single year, and the number of patients with specific chronic  
385 conditions may be underestimated [48, 49]. In addition, we were not able to include healthcare  
386 services provided in the municipalities. Scarce register data exist for municipality services; existing  
387 data are not well defined and thus not useful for research purposes. Inclusion of the data on  
388 utilization of community healthcare services would likely have helped to generate a more complete  
389 picture of healthcare utilization related to multimorbidity. Finally, 6% of our population did not  
390 have information on educational attainment. This information appeared to be missing at random,  
391 except for individuals aged 91 years and above; Danish administrative registers only contain  
392 information on education for individuals born since 1921 [31]. However, this group contained few  
393 individuals, and we estimated the effect of these missing data to be minimal and possible changes in  
394 parameter estimates therefore very small.

395         Comparison to other studies on multimorbidity in populations should be performed with  
396 care. Varying definitions of multimorbidity (i.e., two or more chronic conditions), included  
397 conditions, and data collection methods render comparisons difficult. However, these challenges  
398 may be overcome for large studies [33].

399

## 400 **Conclusion**

401           Multimorbidity is associated with a significant increase in utilization of all healthcare  
402 services in Denmark. A socioeconomic gradient was observed in utilization of hospitalizations, and  
403 socioeconomic effects in utilization of bed days. A steep increase in the utilization of bed days in  
404 patients with six or more chronic conditions suggests a subpopulation of high utilizers that should  
405 be explored in further studies.

406

## 407 **Acknowledgements**

408 We thank Jennifer Green for skillful editing.

409

## 410 **References**

- 411 1. Valderas JM, Starfield B, Sibbald B, Salisbury C, Roland M. Defining comorbidity:  
412 implications for understanding health and health services. *Ann Fam Med*. 2009;7(4):357-63. doi:  
413 10.1370/afm.983.
- 414 2. Mercer S, Furler J, Moffat K, Fischbacher-Smith D, Sanci L. Multimorbidity: technical  
415 series on safer primary care. Geneva: World Health Organization; 2016.
- 416 3. Bayliss EA, Bayliss MS, Ware JE, Steiner JF. Predicting declines in physical function in  
417 persons with multiple chronic medical conditions: what we can learn from the medical problem list.  
418 *Health Qual Life Outcomes*. 2004;2(1):47. doi: 10.1186/1477-7525-2-47.
- 419 4. Williams JS, Egede LE. The association between multimorbidity and quality of life, health  
420 status and functional disability. *Am J Med Sci*. 2016;352(1):45-52. doi:  
421 10.1016/j.amjms.2016.03.004.
- 422 5. Emerging Risk Factors Collaboration. Association of cardiometabolic multimorbidity with  
423 mortality. *JAMA*. 2015;314(1):52-60. doi: 10.1001/jama.2015.7008.
- 424 6. Robinson KM, Lau CJ, Jeppesen M, Vind AB, Glümer C. Kroniske sygdomme-hvordan  
425 opgøres kroniske sygdomme?: Glostrup: Forskningscenter for Forebyggelse og Sundhed [Research  
426 Center for Prevention and Health]; 2011.
- 427 7. Schiøtz ML, Stockmarr A, Høst D, Glümer C, Frølich A. Social disparities in the prevalence  
428 of multimorbidity: a register-based population study. *BMC Public Health*. 2017;17(1):422. doi:  
429 10.1186/s12889-017-4314-8.

- 430 8. Diderichsen F, Evans T, Whitehead M. The social basis of disparities in health. In: Evans T,  
431 Whitehead M, Diderichsen F, Bhulya A, Wirth M, editors. Challenging inequities in health: from  
432 ethics to action. New York: Oxford University Press; 2001. p. 12-23.
- 433 9. Pefoyo AJ, Bronskill SE, Gruneir A, Calzavara A, Thavorn K, Petrosyan Y, et al. The  
434 increasing burden and complexity of multimorbidity. *BMC Public Health*. 2015;15:415. doi:  
435 10.1186/s12889-015-1733-2.
- 436 10. van Oostrom SH, Gijsen R, Stirbu I, Korevaar JC, Schellevis FG, Picavet HSJ, et al. Time  
437 trends in prevalence of chronic diseases and multimorbidity not only due to aging: data from  
438 general practices and health surveys. *PLoS One*. 2016;11(8):e0160264. doi:  
439 10.1371/journal.pone.0160264.
- 440 11. Freid VM, Bernstein AB, Bush MA. Multiple chronic conditions among adults aged 45 and  
441 over: trends over the past 10 years. *NCHS Data Brief*. 2012;(100):1-8.
- 442 12. König H-H, Leicht H, Bickel H, Fuchs A, Gensichen J, Maier W, et al. Effects of multiple  
443 chronic conditions on health care costs: an analysis based on an advanced tree-based regression  
444 model. *BMC Health Serv Res*. 2013;13:219. doi: 10.1186/1472-6963-13-219.
- 445 13. Skinner HG, Coffey R, Jones J, Heslin KC, Moy E. The effects of multiple chronic  
446 conditions on hospitalization costs and utilization for ambulatory care sensitive conditions in the  
447 United States: a nationally representative cross-sectional study. *BMC Health Serv Res*. 2016;16:77.  
448 doi: 10.1186/s12913-016-1304-y.
- 449 14. Lehnert T, Heider D, Leicht H, Heinrich S, Corrieri S, Lupp M, et al. Review: health care  
450 utilization and costs of elderly persons with multiple chronic conditions. *Med Care Res Rev*.  
451 2011;68(4):387-420. doi: 10.1177/1077558711399580.

- 452 15. Schneider KM, O'Donnell BE, Dean D. Prevalence of multiple chronic conditions in the  
453 United States' Medicare population. *Health Qual Life Outcomes*. 2009;7:82. doi: 10.1186/1477-  
454 7525-7-82. PubMed PMID: PMC2748070.
- 455 16. Wolff JL, Starfield B, Anderson G. Prevalence, expenditures, and complications of multiple  
456 chronic conditions in the elderly. *Arch Intern Med*. 2002;162(20):2269-76. doi:  
457 10.1001/archinte.162.20.2269.
- 458 17. Yu W, Ravelo A, Wagner TH, Barnett PG. The relationships among age, chronic conditions,  
459 and healthcare costs. *Am J Manag Care*. 2004;10(12):909-16.
- 460 18. Glynn LG, Valderas JM, Healy P, Burke E, Newell J, Gillespie P, et al. The prevalence of  
461 multimorbidity in primary care and its effect on health care utilization and cost. *Fam Pract*.  
462 2011;28(5):516-23. doi: 10.1093/fampra/cm1013.
- 463 19. Bähler C, Huber CA, Brüngger B, Reich O. Multimorbidity, health care utilization and costs  
464 in an elderly community-dwelling population: a claims data based observational study. *BMC Health  
465 Serv Res*. 2015;15:23. doi: 10.1186/s12913-015-0698-2.
- 466 20. van den Bussche H, Schön G, Kolonko T, Hansen H, Wegscheider K, Glaeske G, et al.  
467 Patterns of ambulatory medical care utilization in elderly patients with special reference to chronic  
468 diseases and multimorbidity; results from a claims data based observational study in Germany.  
469 *BMC Geriatr*. 2011;11:101. doi: 10.1186/1471-2318-11-54.
- 470 21. van Oostrom SH, Picavet HSJ, de Bruin SR, Stirbu I, Korevaar JC, Schellevis FG, et al.  
471 Multimorbidity of chronic diseases and health care utilization in general practice. *BMC Fam Pract*.  
472 2014;15:61. doi: 10.1186/1471-2296-15-61. PubMed PMID: PMC4021063.
- 473 22. Wang HHX, Wang JJ, Lawson KD, Wong SYS, Wong MCS, Li FJ, et al. Relationships of  
474 multimorbidity and income with hospital admissions in 3 health care systems. *Ann Fam Med*.  
475 2015;13(2):164-7. doi: 10.1370/afm.1757. PubMed PMID: PMC4369606.

- 476 23. McPhail SM. Multimorbidity in chronic disease: impact on health care resources and costs.  
477 Risk Manage Healthc Policy. 2016;9:143-56. doi: 10.2147/RMHP.S97248. PubMed PMID:  
478 PMC4939994.
- 479 24. Palladino R, Tayu Lee J, Ashworth M, Triassi M, Millett C. Associations between  
480 multimorbidity, healthcare utilisation and health status: evidence from 16 European countries. Age  
481 Ageing. 2016;45(3):431-5. doi: 10.1093/ageing/afw044.
- 482 25. Erlangsen A, Fedyszyn I. Danish nationwide registers for public health and health-related  
483 research. Scan J Public Health. 2015;43(4):333-9. doi: 10.1177/1403494815575193. PubMed  
484 PMID: 25759376.
- 485 26. Thygesen LC, Ersbøll AK. Danish population-based registers for public health and health-  
486 related welfare research: introduction to the supplement. Scan J Public Health. 2011;39(7 Suppl):8-  
487 10. doi: 10.1177/1403494811409654.
- 488 27. Lynge E, Sandegaard JL, Rebolj M. The Danish national patient register. Scan J Public  
489 Health. 2011;39(7 Suppl):30-3. doi: 10.1177/1403494811401482. PubMed PMID: 21775347.
- 490 28. Wallach Kildemoes H, Toft Sørensen H, Hallas J. The Danish national prescription registry.  
491 Scan J Public Health. 2011;39(7 Suppl):38-41. doi: 10.1177/1403494810394717.
- 492 29. Olivarius NF, Hollnagel H, Krasnik A, Pedersen PA, Thorsen H. The Danish national health  
493 service register. a tool for primary health care research. Dan Med Bull. 1997;44(4):449-53. PubMed  
494 PMID: 9377908.
- 495 30. Carstensen B, Kristensen JK, Marcussen MM, Borch-Johnsen K. The national diabetes  
496 register. Scan J Public Health. 2011;39(7 Suppl):58-61. doi: 10.1177/1403494811404278. PubMed  
497 PMID: 21775353.
- 498 31. Jensen VM, Rasmussen AW. Danish education registers. Scan J Public Health. 2011;39(7  
499 Suppl):91-4. doi: 10.1177/1403494810394715. PubMed PMID: 21775362.



- 500 32. Lachenbruch PA. Analysis of data with excess zeros. *Stat Methods Med Res.*  
501 2002;11(4):297-302. doi: 10.1191/0962280202sm289ra. PubMed PMID: 12197297.
- 502 33. Barnett K, Mercer SW, Norbury M, Watt G, Wyke S, Guthrie B. Epidemiology of  
503 multimorbidity and implications for health care, research, and medical education: a cross-sectional  
504 study. *Lancet.* 2012;380(9836):37-43. doi: 10.1016/S0140-6736(12)60240-2.
- 505 34. Abad-Díez JM, Calderón-Larrañaga A, Poncel-Falcó A, Poblador-Plou B, Calderón-Meza  
506 JM, Sicras-Mainar A, et al. Age and gender differences in the prevalence and patterns of  
507 multimorbidity in the older population. *BMC Geriatr.* 2014;14:75. doi: 10.1186/1471-2318-14-75.
- 508 35. Rzewuska M, de Azevedo-Marques JM, Coxon D, Zanetti ML, Zanetti ACG, Franco LJ, et  
509 al. Epidemiology of multimorbidity within the Brazilian adult general population: evidence from  
510 the 2013 national health survey (PNS 2013). *PLoS One.* 2017;12(2):e0171813. doi:  
511 10.1371/journal.pone.0171813.
- 512 36. Alimohammadian M, Majidi A, Yaseri M, Ahmadi B, Islami F, Derakhshan M, et al.  
513 Multimorbidity as an important issue among women: results of a gender difference investigation in  
514 a large population-based cross-sectional study in West Asia. *BMJ Open.* 2017;7(5). doi:  
515 10.1136/bmjopen-2016-013548.
- 516 37. Caughey GE, Ramsay EN, Vitry AI, Gilbert AL, Luszcz MA, Ryan P, et al. Comorbid  
517 chronic diseases, discordant impact on mortality in older people: a 14-year longitudinal population  
518 study. *J Epidemiol Community Health.* 2010;64(12):1036-42. doi: 10.1136/jech.2009.088260.
- 519 38. Jindai K, Nielson CM, Vorderstrasse BA, Quiñones AR. Multimorbidity and functional  
520 limitations among adults 65 or older, NHANES 2005–2012. *Prev Chronic Dis.* 2016;13:E151. doi:  
521 10.5888/pcd13.160174. PubMed PMID: PMC5094859.

- 522 39. Hopman P, Heins MJ, Rijken M, Schellevis FG. Health care utilization of patients with  
523 multiple chronic diseases in the Netherlands: differences and underlying factors. *Eur J Intern Med.*  
524 2015;26(3):190-6. doi: 10.1016/j.ejim.2015.02.006.
- 525 40. van den Bussche H, Kaduszkiewicz H, Schäfer I, Koller D, Hansen H, Scherer M, et al.  
526 Overutilization of ambulatory medical care in the elderly German population?: an empirical study  
527 based on national insurance claims data and a review of foreign studies. *BMC Health Serv Res.*  
528 2016;16:129. doi: 10.1186/s12913-016-1357-y. PubMed PMID: PMC4831189.
- 529 41. Westert GP, Satariano WA, Schellevis FG, Van Den Bos GAM. Patterns of comorbidity and  
530 the use of health services in the Dutch population. *Eur J Public Health.* 2001;11(4):365-72. doi:  
531 10.1093/eurpub/11.4.365.
- 532 42. Lau CJ, Lykke M, Andreasen AH, Bekker-Jeppesen M, Buhelt LP, Robinson KM, et al.  
533 Sundhedsprofil 2013-kronisk sygdom. Glostrup: Forskningscenter for Forebyggelse og Sundhed,  
534 Region Hovedstaden; 2015.
- 535 43. Zulman DM, Pal Chee C, Wagner TH, Yoon J, Cohen DM, Holmes TH, et al.  
536 Multimorbidity and healthcare utilisation among high-cost patients in the US Veterans Affairs  
537 health care system. *BMJ Open.* 2015;5(4). doi: 10.1136/bmjopen-2015-007771.
- 538 44. van der Heide I, Wang J, Droomers M, Spreeuwenberg P, Rademakers J, Uiters E. The  
539 relationship between health, education, and health literacy: results from the Dutch adult literacy and  
540 life skills survey. *J Health Commun.* 2013;18(Suppl 1):172-84. doi:  
541 10.1080/10810730.2013.825668.
- 542 45. Agardh EE, Sidorchuk A, Hallqvist J, Ljung R, Peterson S, Moradi T, et al. Burden of type  
543 2 diabetes attributed to lower educational levels in Sweden. *Popul Health Metr.* 2011;9(1):60. doi:  
544 10.1186/1478-7954-9-60.

- 545 46. Aartsen M, Veenstra M, Hansen T. Social pathways to health: On the mediating role of the  
546 social network in the relation between socio-economic position and health. *SSM - population*  
547 *health*. 2017;3:419-26. doi: 10.1016/j.ssmph.2017.05.006. PubMed PMID: 29349235.
- 548 47. Thygesen LC, Daasnes C, Thaulow I, Brønnum-Hansen H. Introduction to Danish  
549 (nationwide) registers on health and social issues: structure, access, legislation, and archiving. *Scan*  
550 *J Public Health*. 2011;39(7 Suppl):12-6. doi: 10.1177/1403494811399956.
- 551 48. van Oostrom SH, Picavet HSJ, van Gelder BM, Lemmens LC, Hoeymans N, van Dijk CE,  
552 et al. Multimorbidity and comorbidity in the Dutch population: data from general practices. *BMC*  
553 *Public Health*. 2012;12:715. doi: 10.1186/1471-2458-12-715.
- 554 49. Schram MT, Frijters D, van de Lisdonk EH, Ploemacher J, de Craen AJM, de Waal MWM,  
555 et al. Setting and registry characteristics affect the prevalence and nature of multimorbidity in the  
556 elderly. *J Clin Epidemiol*. 2008;61(11):1104-12. doi: 10.1016/j.jclinepi.2007.11.021.
- 557
- 558
- 559

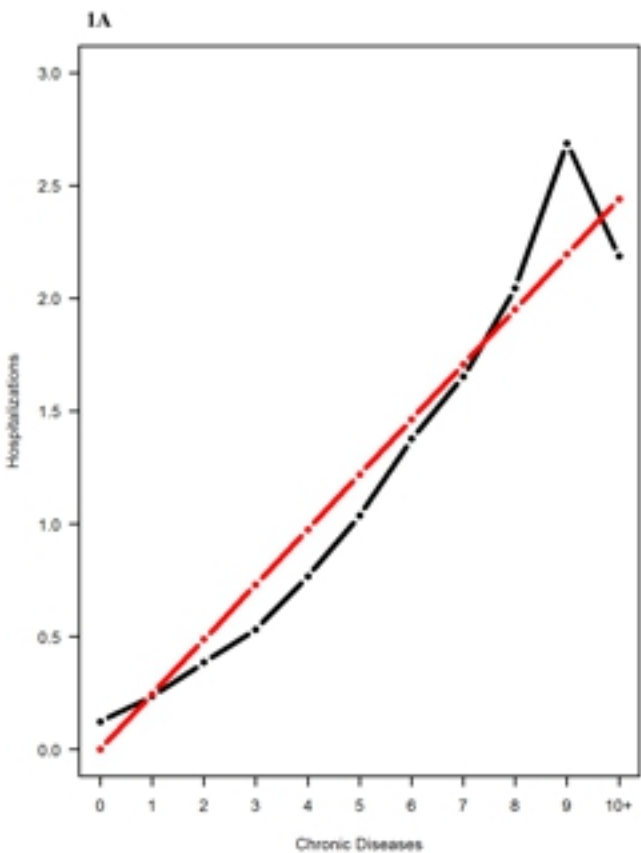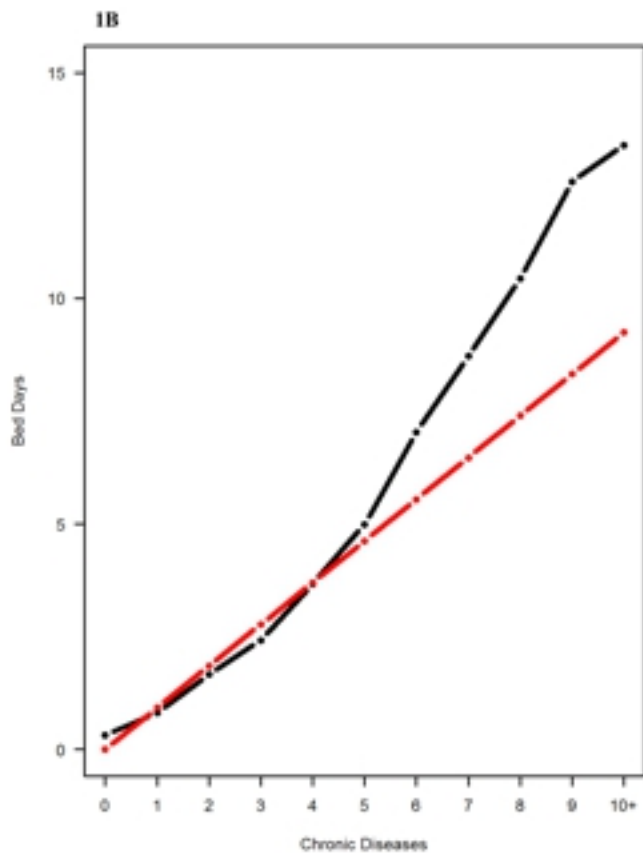

Fig1

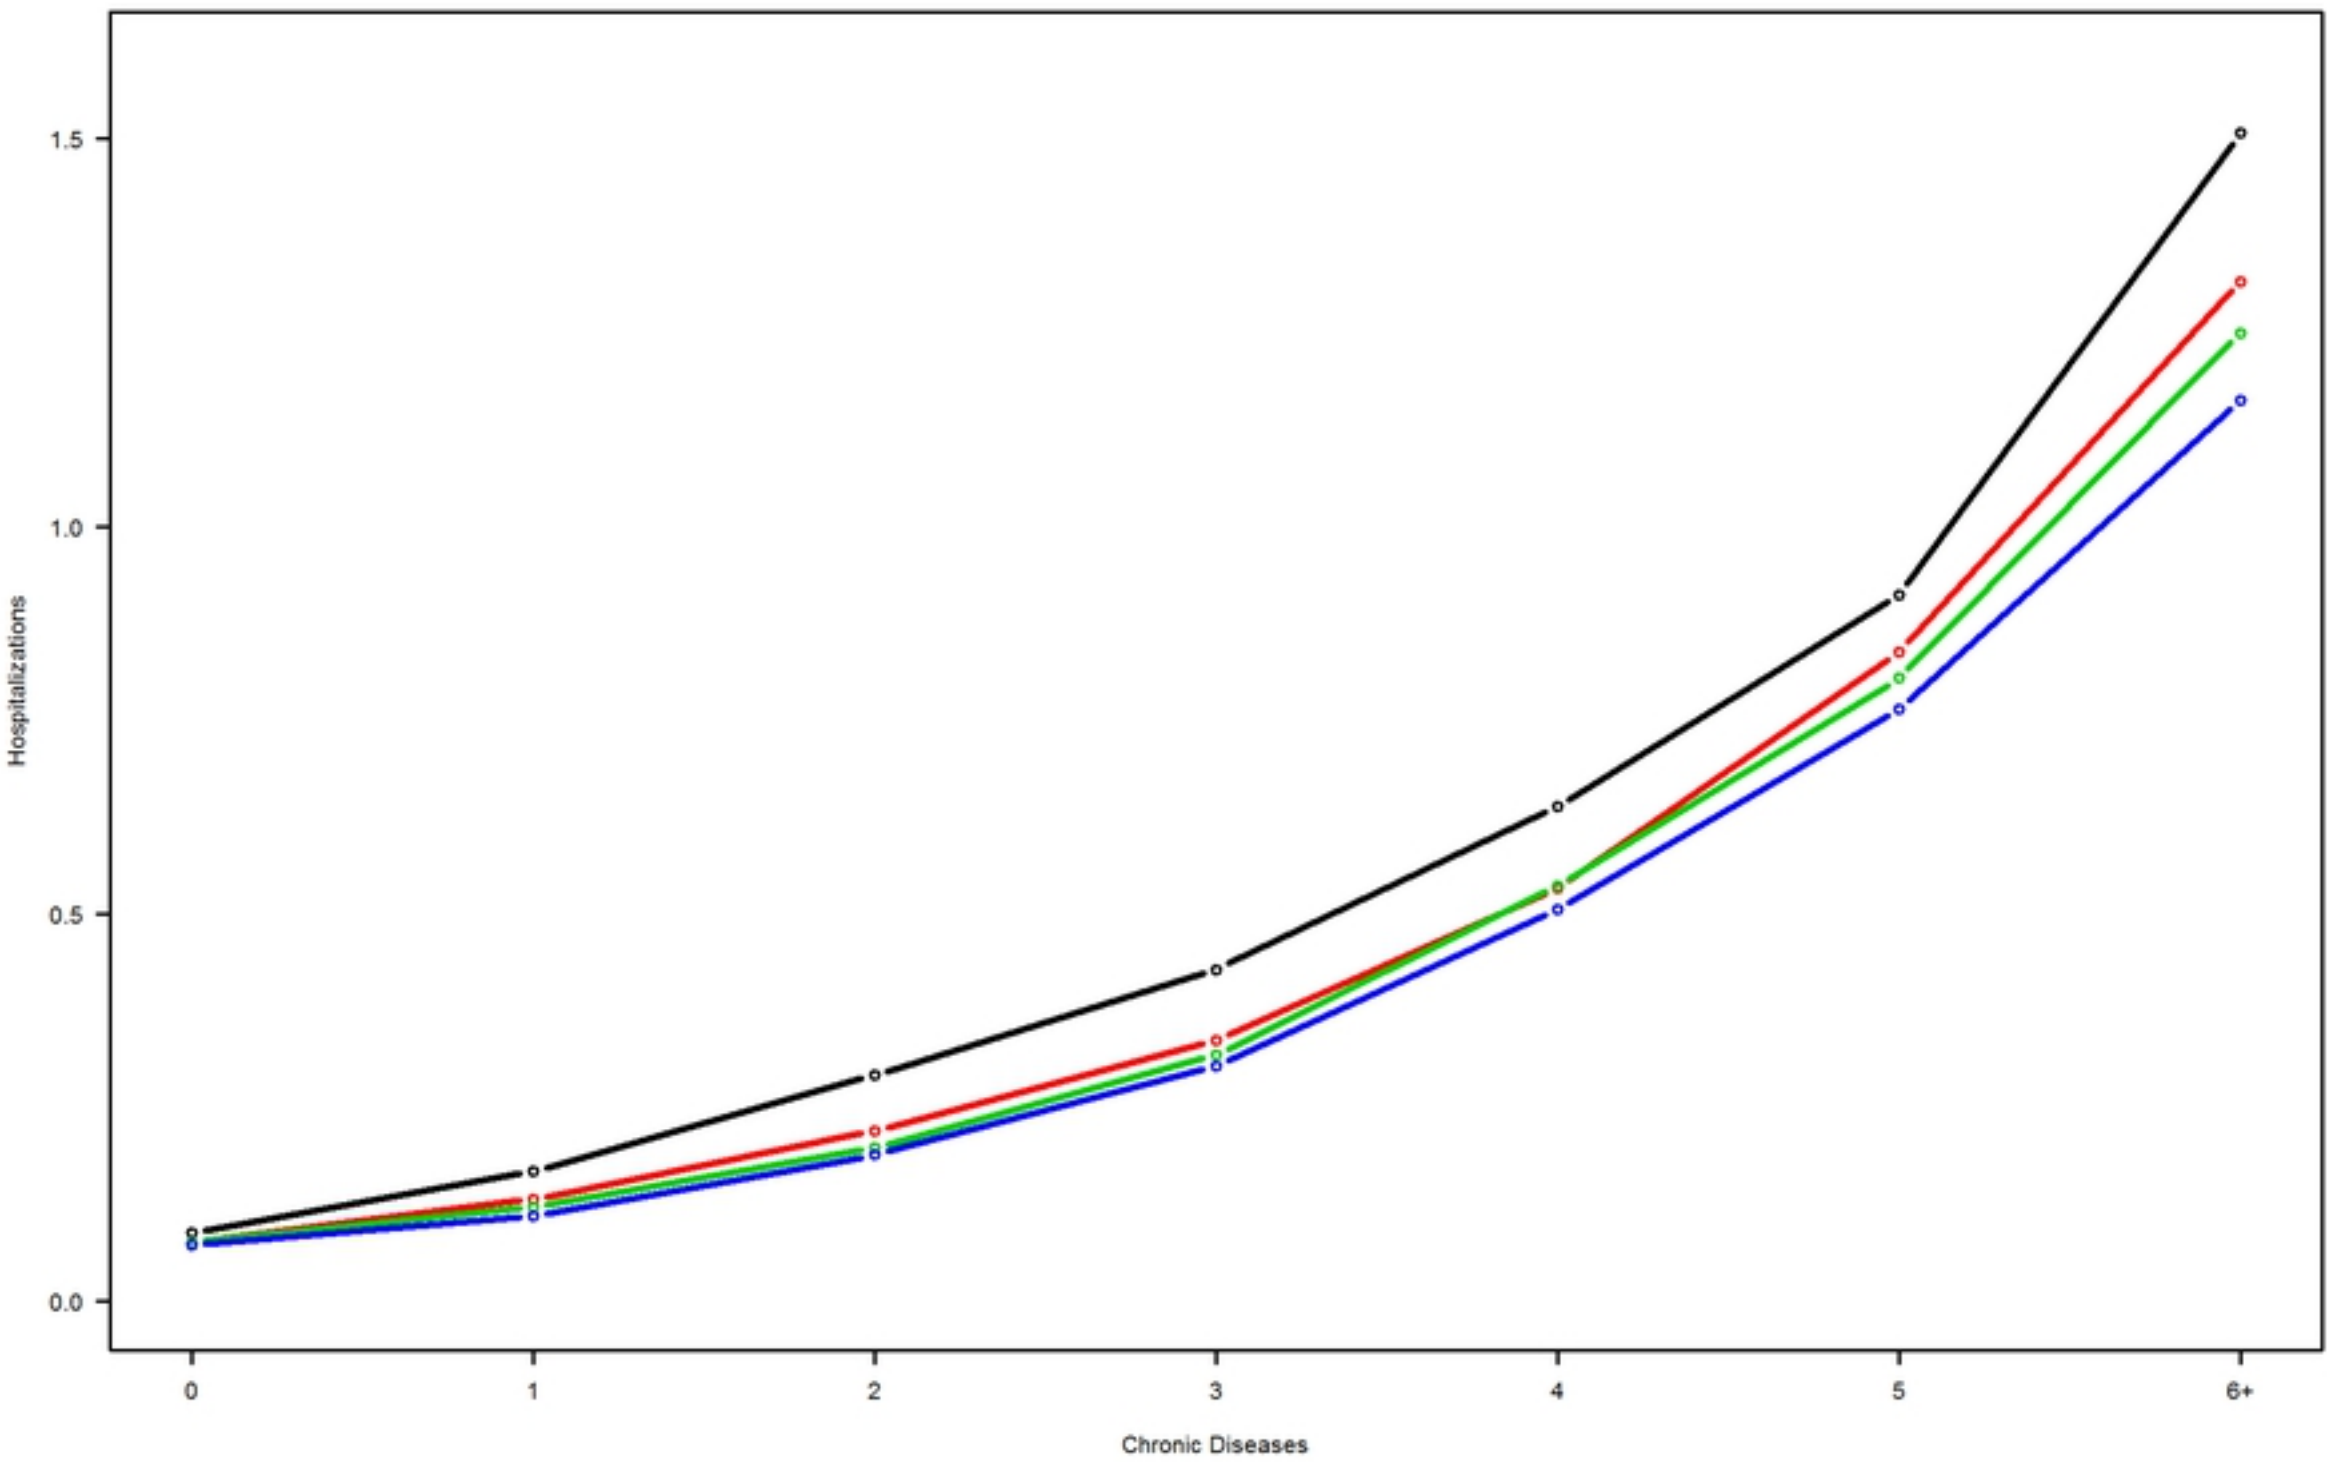

Fig2

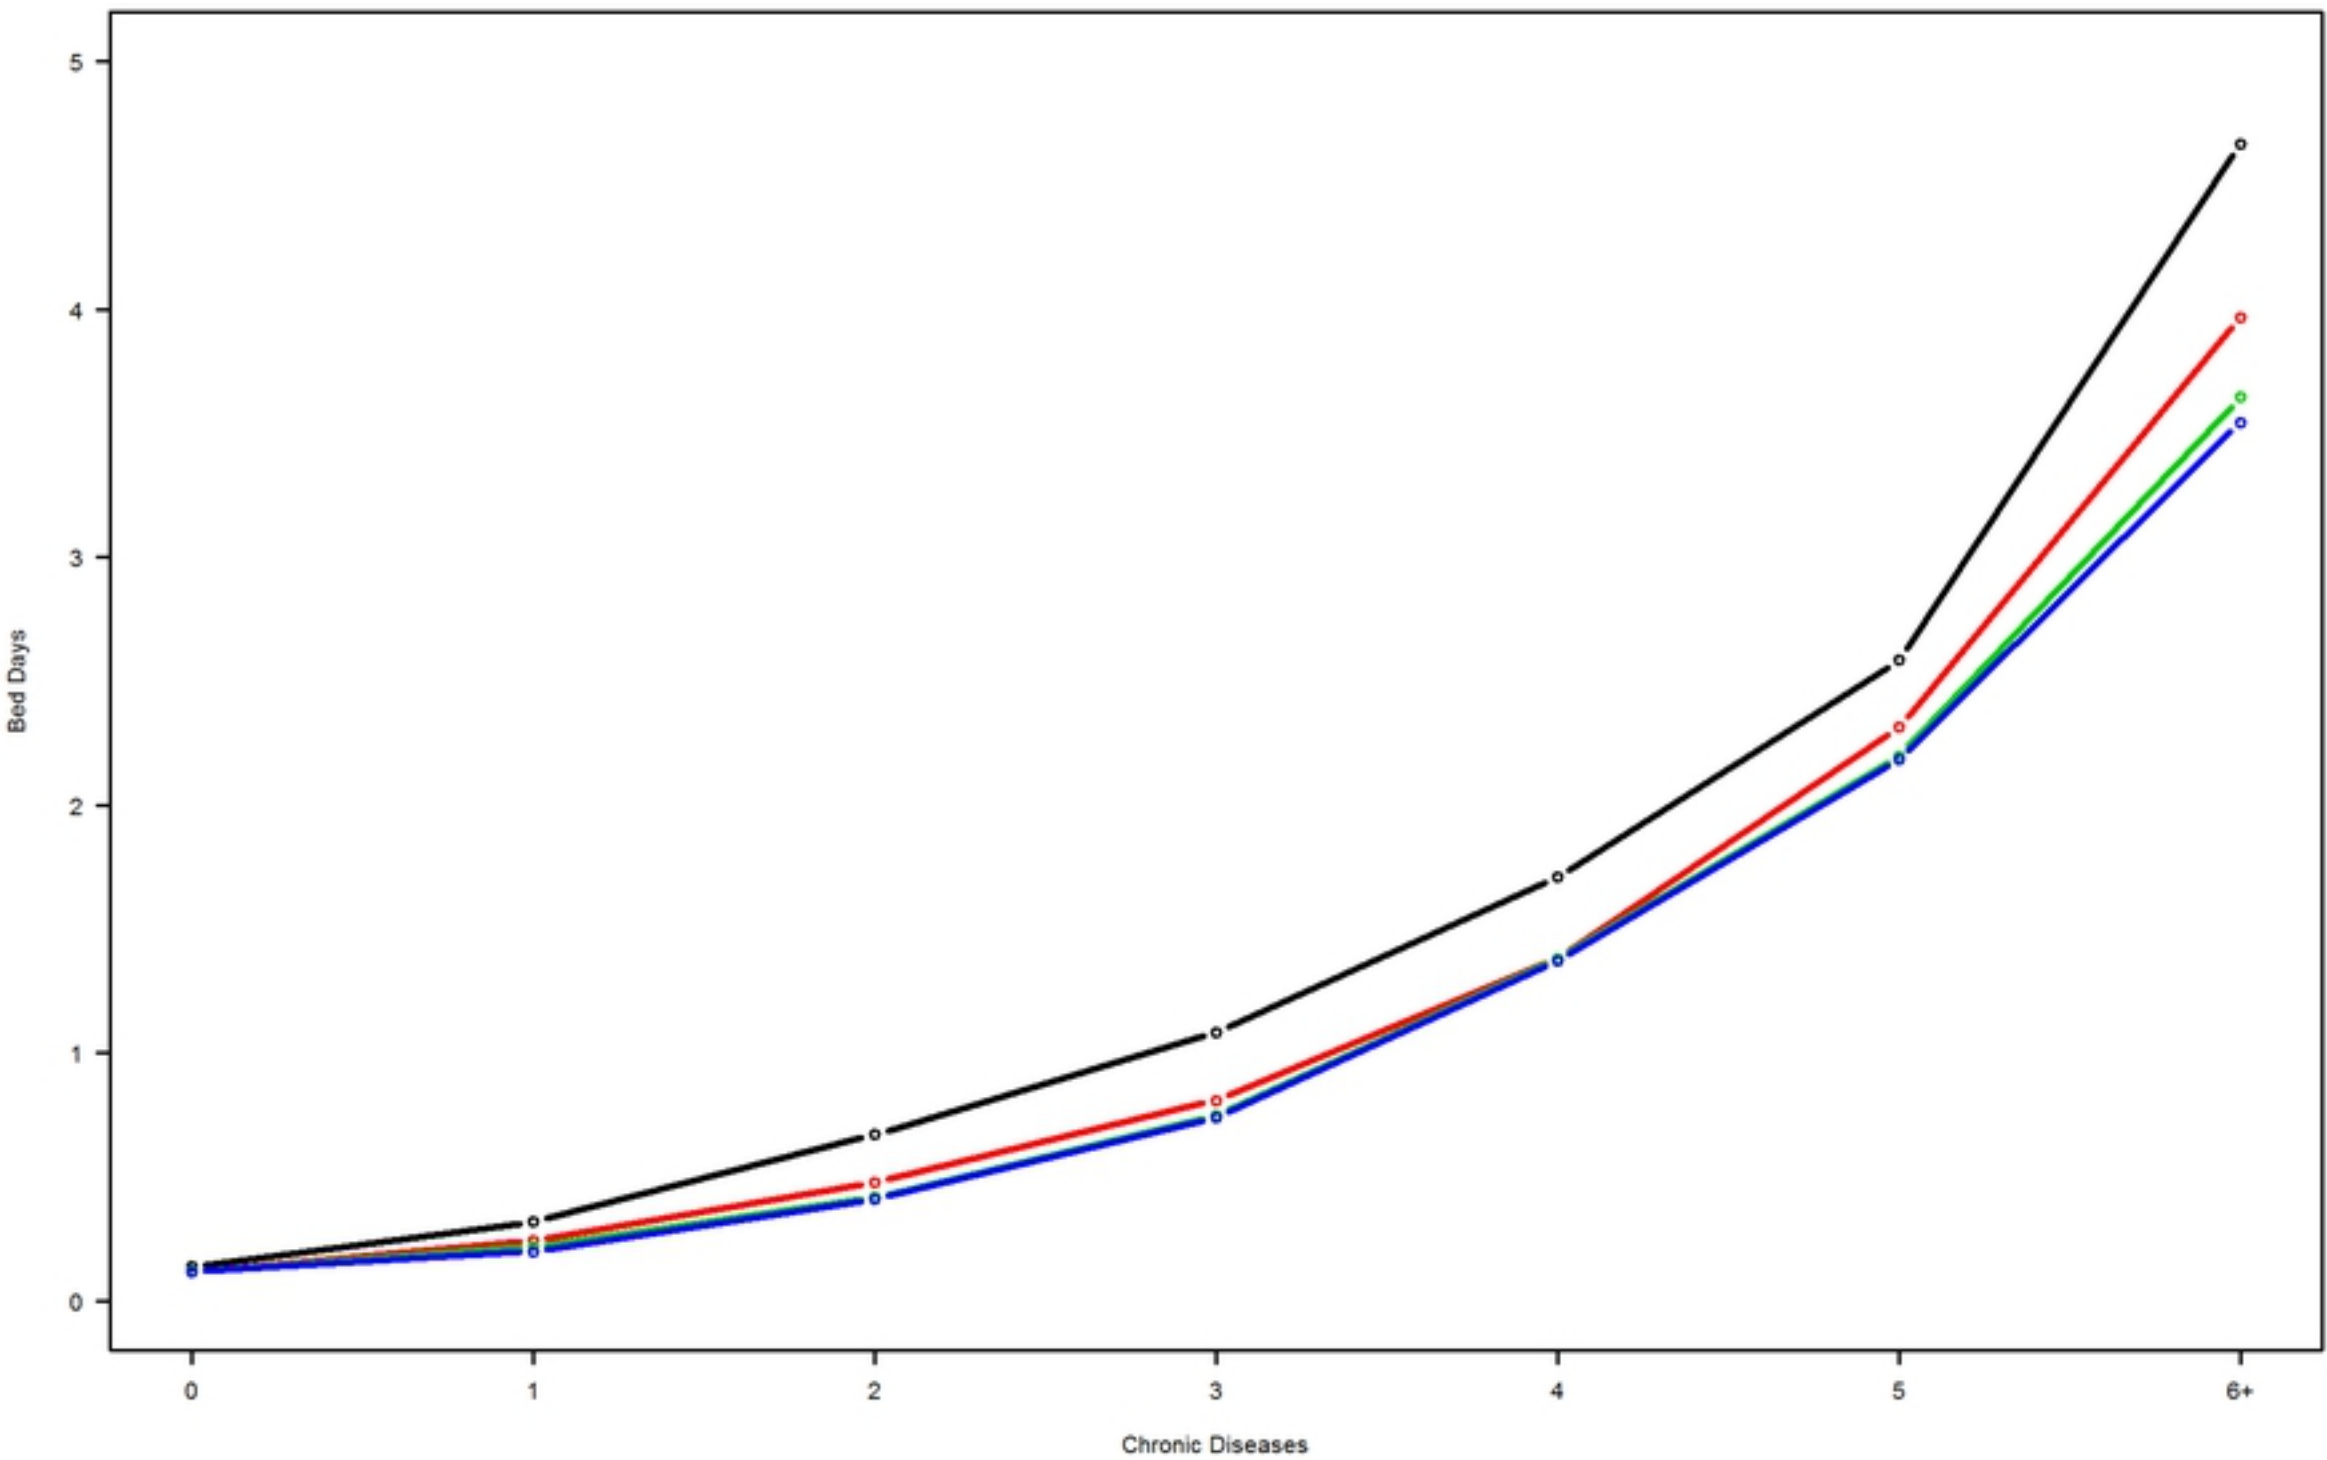

Fig3
